# Supplementary material for: BiFeO3/YSZ bilayer electrolyte for low temperature solid oxide fuel cell
Source: Royal Society of Chemistry journal article supplement (doi:10.1039/c4ra01862a), 2014-01-01
Supplement: c4ra01862a1.pdf [file c4ra01862a1.pdf]

Electronic Supplementary Material (ESI) for RSC Advances.  
This journal is © The Royal Society of Chemistry 2014

## Supporting Information

### BiFeO<sub>3</sub>/YSZ bilayer electrolyte for low temperature solid oxide fuel cell

Yu-Chieh Tu,<sup>a</sup> Chun-Yu Chang,<sup>a</sup> Ming-Chung Wu,<sup>b</sup> Jing-Jong Shyue<sup>a,c</sup> and Wei-Fang Su<sup>\*a</sup>

<sup>a</sup> No. 1, Sec. 4, Roosevelt Road, Department of Materials Science and Engineering, National Taiwan University, Taipei 10617, Taiwan.

Fax: +886 2 33664078; Tel: +886 2 33664078; E-mail: [suwf@ntu.edu.tw](mailto:suwf@ntu.edu.tw)

<sup>b</sup>No. 259, Wen-Hwa 1st Road, Department of Chemical and Materials Engineering, Chang Gung University, Taoyuan 333-02, Taiwan.

<sup>c</sup> No. 128, Sec. 2, Academia Road, Research Center for Applied Sciences, Academia Sinica, Taipei 11529, Taiwan.

**Table S1** EDX elemental Analysis of BFO electrolyte with and without YSZ protecting layer after the fuel cell operated at 700°C.

| Element | Atomic (%) |             |
|---------|------------|-------------|
|         | With YSZ   | Without YSZ |
| Bi      | 18.00      | 2.74        |
| Fe      | 18.03      | 37.62       |
| O       | 63.97      | 59.64       |

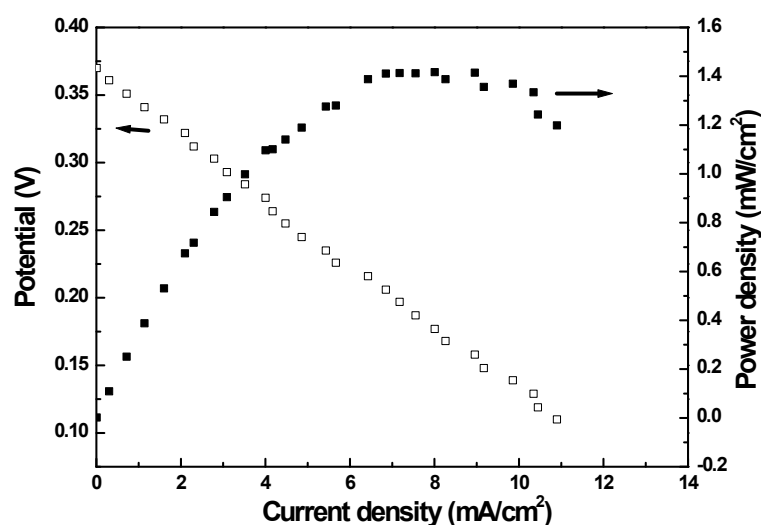

**Fig. S1** Fuel cell performance using BFO only electrolyte at 700°C.

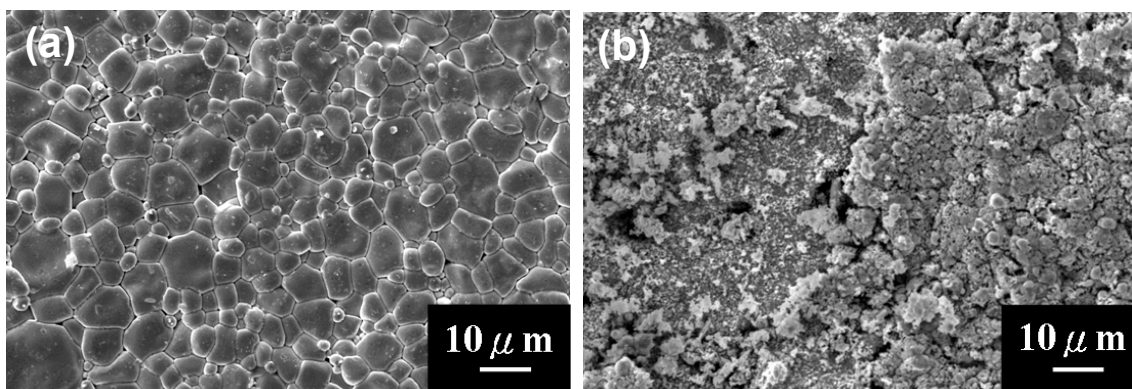

**Fig. S2** SEM photos of BFO only electrolyte (a) before and (b) after the fuel cell operated at 700°C.

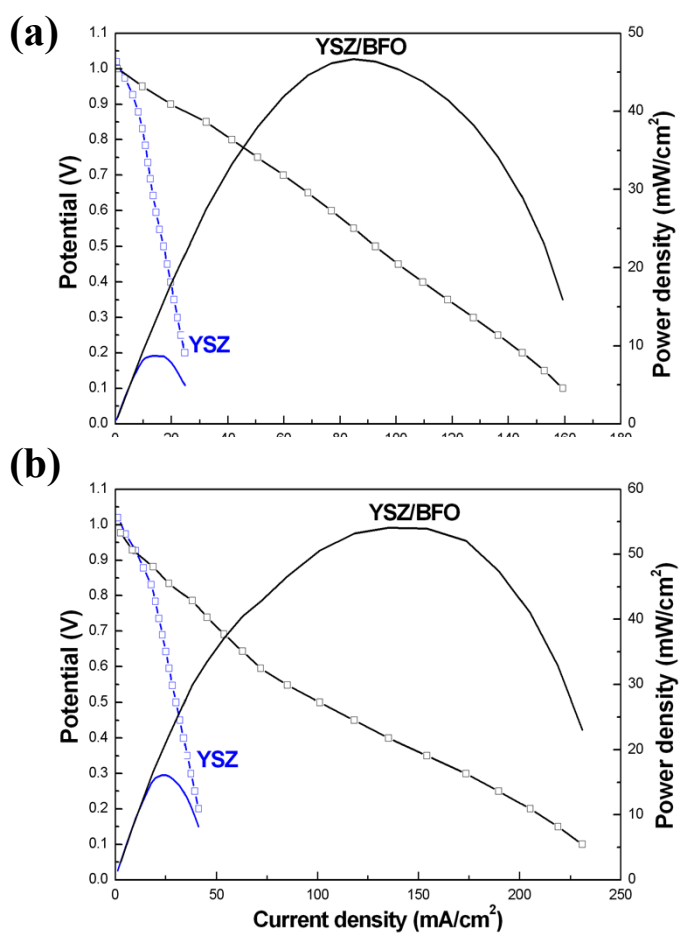

**Fig. S3** Comparison of fuel cells performance with YSZ/BFO (103μm/38μm) electrolytes or YSZ (98μm) electrolyte at (a) 650°C and (b) 700°C operating temperature.
